# Supplementary material for: Hollow nanocubes composed of well-dispersed mixed metal-rich phosphides in N-doped carbon as highly efficient and durable electrocatalysts for the oxygen evolution reaction at high current densities
Source: Royal Society of Chemistry journal article supplement (doi:10.1039/c7ta04905f), 2017-01-01
Supplement: c7ta04905f3.pdf [file c7ta04905f3.pdf]

## Supporting Information

### Hollow Nanocubes Composed of Well-dispersed Mixed Metal-rich Phosphides in N-doped Carbon as Highly Efficient and Durable Electrocatalysts for Oxygen Evolution Reaction at High Current Densities

Lei Zhang, Chun Chang, Chan-Wei Hsu, Chih-Wen Chang, Shih-Yuan Lu\*

#### Experimental Section

##### Materials:

Nickel (II) sulfate hexahydrate ( $\text{NiSO}_4 \cdot 6\text{H}_2\text{O}$ ), potassium hexacyanoferrate (III) ( $\text{K}_3[\text{Fe}(\text{CN})_6]$ ), trisodium citrate dihydrate ( $\text{Na}_3\text{C}_6\text{H}_5\text{O}_7 \cdot 2\text{H}_2\text{O}$ ), tetraethyl orthosilicate (TEOS), sodium hypophosphite ( $\text{NaH}_2\text{PO}_2 \cdot \text{H}_2\text{O}$ ), methanol, ethanol, and ammonium hydroxide were purchased from Sigma-Aldrich. All the reagents were of analytical grade and used as received.

##### Materials preparation:

**Preparation of  $\text{Ni}_3[\text{Fe}(\text{CN})_6]_2 \cdot \text{H}_2\text{O}$  nanocube:** Typically, 0.006 mol of  $\text{NiSO}_4 \cdot 6\text{H}_2\text{O}$  and 0.0075 mol of  $\text{Na}_3\text{C}_6\text{H}_5\text{O}_7 \cdot 2\text{H}_2\text{O}$  were dissolved in 590 mL of deionized water to form solution A. Then, 0.004 mol of  $\text{K}_3[\text{Fe}(\text{CN})_6]$  was dissolved in 10 mL of deionized water to form solution B. Solutions A and B were thoroughly mixed under magnetic stirring for precipitation, followed by 24 h aging. The precipitates were collected with a centrifuge, washed with deionized water and absolute ethanol five times, and then dried in vacuum at 50 °C for 24 h.

**Preparation of  $\text{SiO}_2$  coated  $\text{Ni}_3[\text{Fe}(\text{CN})_6]_2 \cdot \text{H}_2\text{O}$  nanocube:** An amount of 0.3 g of  $\text{Ni}_3[\text{Fe}(\text{CN})_6]_2 \cdot \text{H}_2\text{O}$  nanocubes were dispersed in 160 mL of ethanol under sonication. Ten

milliliters of ammonium hydroxide, 6 mL of methanol, and 1.2 mL of TEOS were added in turn into the suspension slowly. The resulting suspension was aged for 4 h at room temperature under magnetic stirring. The precipitates were collected with a centrifuge, washed with deionized water and absolute ethanol five times, and then dried in vacuum at 70 °C overnight.

***Preparation of N doped C/Ni<sub>3</sub>P<sub>4</sub>/Fe<sub>3</sub>P hollow nanocube:*** Three grams of NaH<sub>2</sub>PO<sub>2</sub> and 0.3 g of SiO<sub>2</sub> coated Ni<sub>3</sub>[Fe(CN)<sub>6</sub>]<sub>2</sub>·H<sub>2</sub>O nanocubes were loaded separately into two porcelain boats, and the two precursor-containing boats were situated side by side at the center of a tube furnace with the NaH<sub>2</sub>PO<sub>2</sub>-containing boat being placed upstream. The calcination was conducted at 400 °C for 4 h with a heating rate of 5 °C min<sup>-1</sup> under N<sub>2</sub> atmosphere, followed by cooling to ambient temperature under N<sub>2</sub> gas flow. The SiO<sub>2</sub> shell of the product was removed with etching in a 1 wt% HF solution for 24 h. For preparation of N-doped C coated Ni<sub>3</sub>P<sub>4</sub>/Fe<sub>3</sub>P nanoparticles, Ni<sub>3</sub>[Fe(CN)<sub>6</sub>]<sub>2</sub>·H<sub>2</sub>O nanocubes served as the starting material instead of SiO<sub>2</sub> coated Ni<sub>3</sub>[Fe(CN)<sub>6</sub>]<sub>2</sub>·H<sub>2</sub>O nanocubes, following the same procedures as above without the unnecessary HF etching step.

#### **Materials Characterizations:**

The composition and crystalline phase of the sample were investigated with powder X-ray diffraction measurements (XRD, Shimadzu XRD-6000, Japan), X-ray photoelectron spectroscopy (XPS, Thermo ESCALAB 250XI, America), energy dispersive spectrometry (EDS, Hitachi S-4800, Japan), and selected area electron diffraction (JEM-2100, Japan). The morphology and microstructure of the product were observed with a scanning electron microscope (SEM, Hitachi S-4800, Japan) and a high resolution transmission electron microscope (TEM, JEM-2100, Japan). Raman spectra were recorded at room temperature in the spectral range of 1000-2000 cm<sup>-1</sup> using a

Raman spectromicroscope (LabRAM HR800, Horiba Jobin Yvon, France). The specific surface areas of the samples were determined from the N<sub>2</sub> sorption/desorption isotherms, based on the Brunauer-Emmett-Teller model, measured with a Micrometrics ASAP 2010.

### **Electrochemical characterizations:**

The electrochemical performances of the samples were characterized on a CHI6275D electrochemical workstation in a three-electrode system. The working electrode was prepared using the as-prepared powders (85 wt%) as the active material and polyvinylidene fluoride (15 wt%) as the binder. They were mixed in N-methylpyrrolidone (NMP) to form a sample suspension. The working electrode was fabricated by drop-casting the sample suspension, sonicated for 30 min before use, onto a graphite electrode (1 cm × 1 cm) and dried at 80 °C in an oven. The mass loading of the active material on the working electrode was controlled to be around 0.5 mg/cm<sup>2</sup>. A platinum foil counter electrode and an Hg/HgO reference electrode were employed to complete the three-electrode system. For the measurements, 1 M KOH (pH = 13.7) aqueous solution was used as the electrolyte. Potentials reported in this study were converted to values referring to the reversible hydrogen electrode (RHE) using the equation  $E_{\text{RHE}} = E_{\text{Hg/HgO}} + 0.118 + 0.059\text{pH}$ , where  $E_{\text{Hg/HgO}}$  is the applied potential against the Hg/HgO reference electrode. All the current densities were iR-corrected. The over-potential ( $\eta$ ) was calculated using the equation:  $\eta = E_{\text{RHE}} - 1.23$ . Prior to electrochemical measurements, the working electrode was conditioned by cycling through the potential window of 0 to 0.8 V vs. Hg/HgO thirty times at a scan rate of 100 mV/s. The polarization curves were recorded with a linear potential sweep at a scan rate of 10 mV/s. The electrochemical impedance spectroscopy measurements were conducted in the same set up from 10<sup>5</sup> to 0.01 Hz with an AC amplitude of 5 mV. The double layer capacitance ( $C_{\text{dl}}$ ), which is

linearly proportional to the electrochemical active surface areas (ECSA) of the catalysts, was measured to estimate the ECSA of the catalyst. The  $C_{dl}$  values were determined from the cyclic voltammograms recorded at non-Faradaic potentials (0.83-1.03 V vs. RHE) at increasing scan rates. The  $C_{dl}$  was obtained as the slope of the capacitive current density (at 0.95 V vs. RHE) vs. scan rate curve.

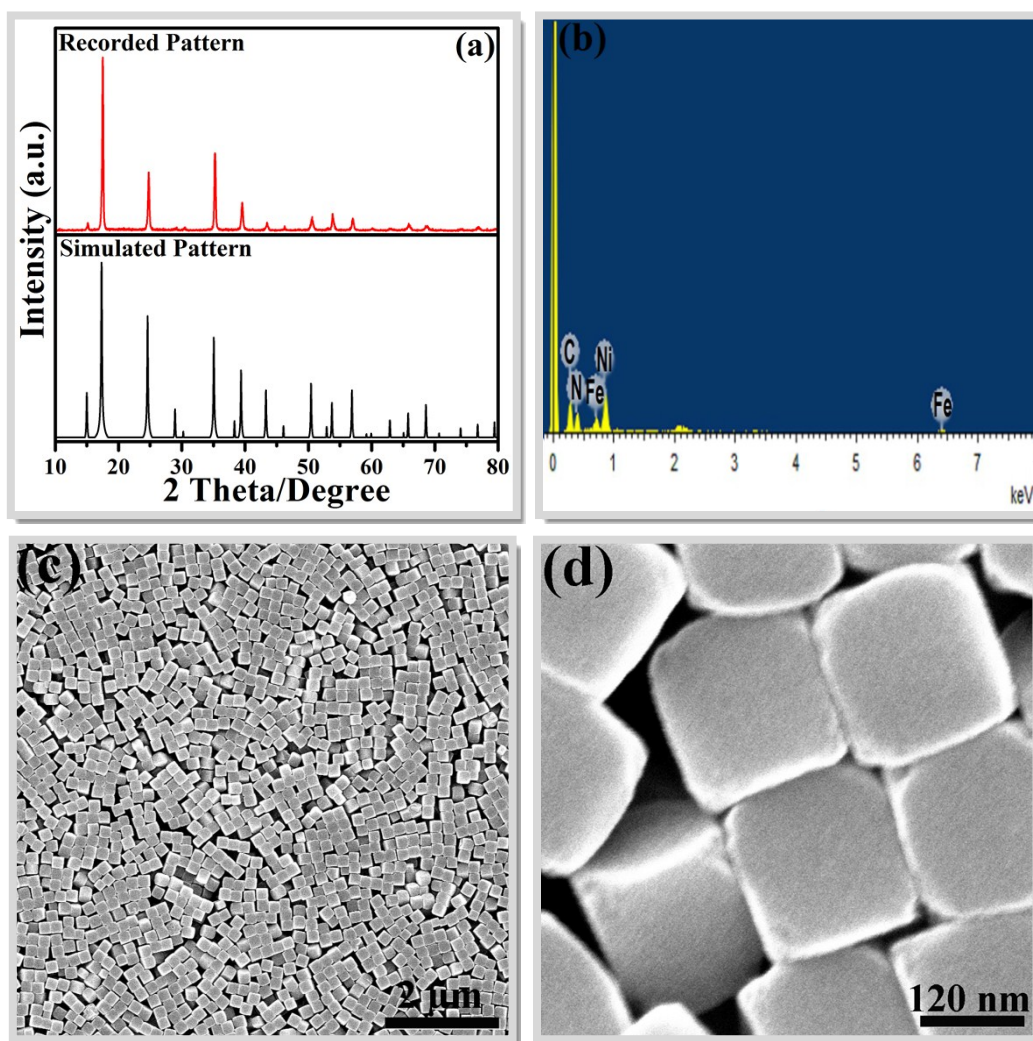

**Figure S1** (a) XRD pattern, (b) EDS spectrum, and (c-d) SEM images of as-prepared  $\text{Ni}_3[\text{Fe}(\text{CN})_6]_2 \cdot \text{H}_2\text{O}$  nanocubes.

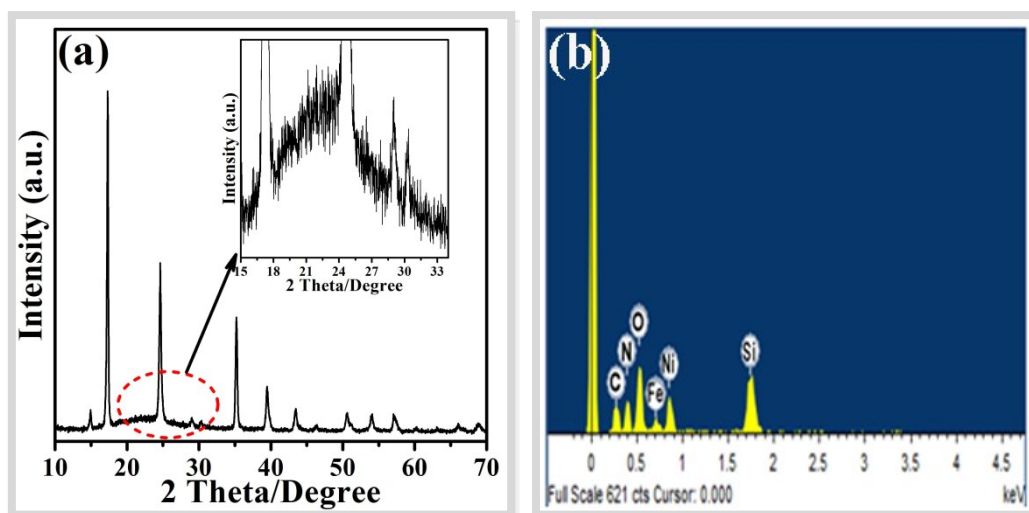

**Figure S2** (a) XRD pattern and (b) EDS spectrum of SiO<sub>2</sub> coated Ni<sub>3</sub>[Fe(CN)<sub>6</sub>]<sub>2</sub>·H<sub>2</sub>O nanocubes.

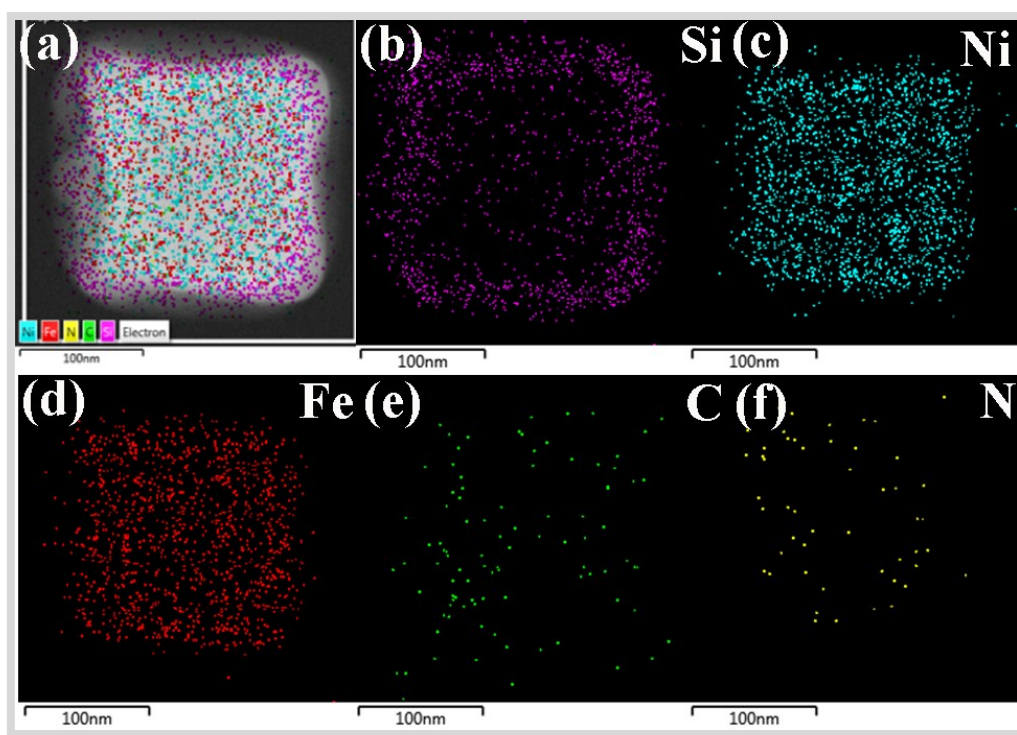

**Figure S3** EDS elemental mapping images of SiO<sub>2</sub> coated Ni<sub>3</sub>[Fe(CN)<sub>6</sub>]<sub>2</sub>·H<sub>2</sub>O nanocubes: (a) composite, (b) Si, (c) Ni, (d) Fe, (e) C, and (f) N.

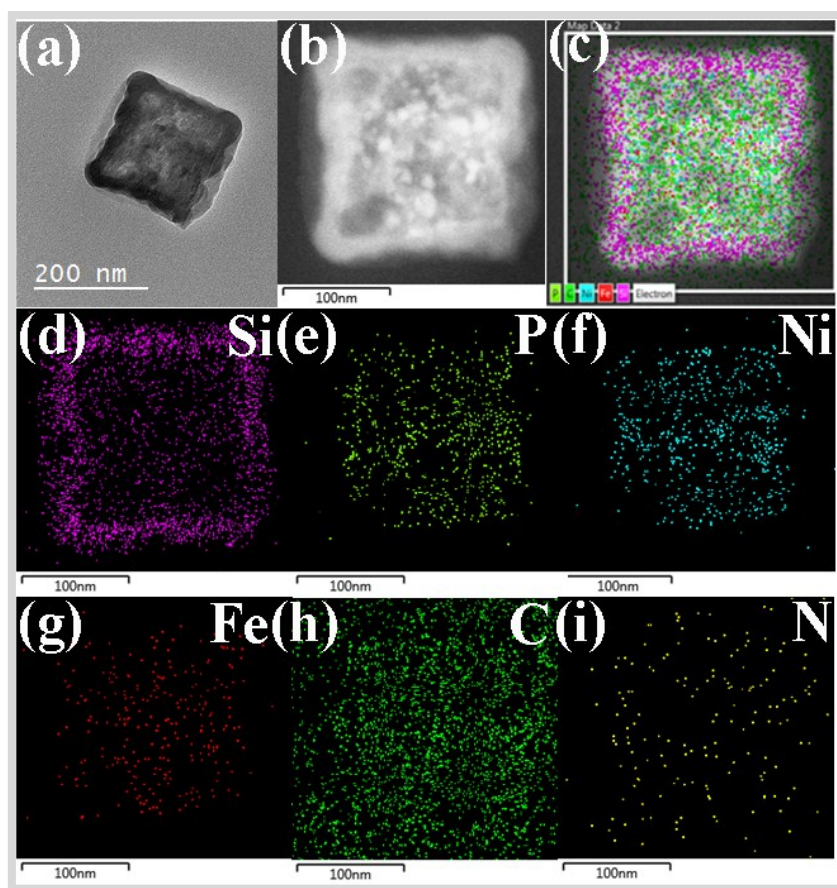

**Figure S4** (a) TEM and (b) high-angle annular dark-field scanning transmission electron microscopy images, and EDS elemental mapping images of SiO<sub>2</sub> coated N-doped C/Ni<sub>5</sub>P<sub>4</sub>/Fe<sub>3</sub>P hollow nanocubes: (c) composite, (d) Si, (e) P, (f) Ni, (g) Fe, (h) C, and (i) N.



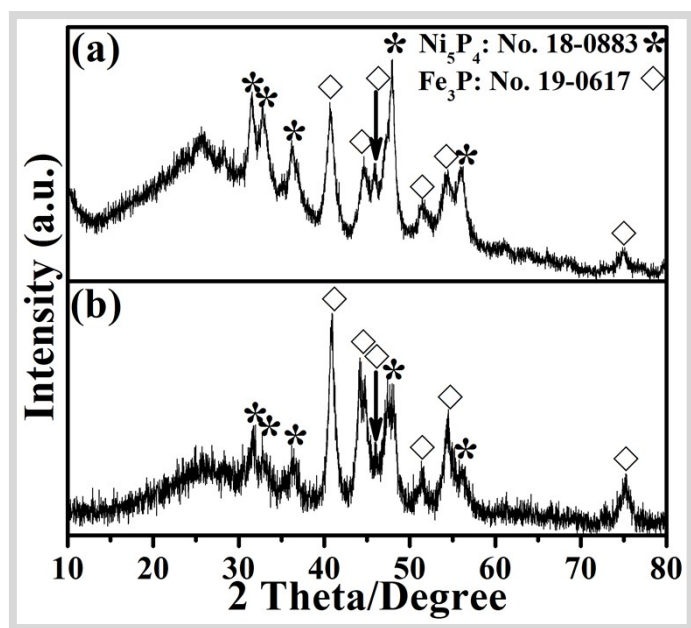

**Figure S5** XRD patterns of (a) N-doped C/Ni<sub>5</sub>P<sub>4</sub>/Fe<sub>3</sub>P hollow nanocubes and (b) N-doped C coated Ni<sub>5</sub>P<sub>4</sub>/Fe<sub>3</sub>P nanoparticles.

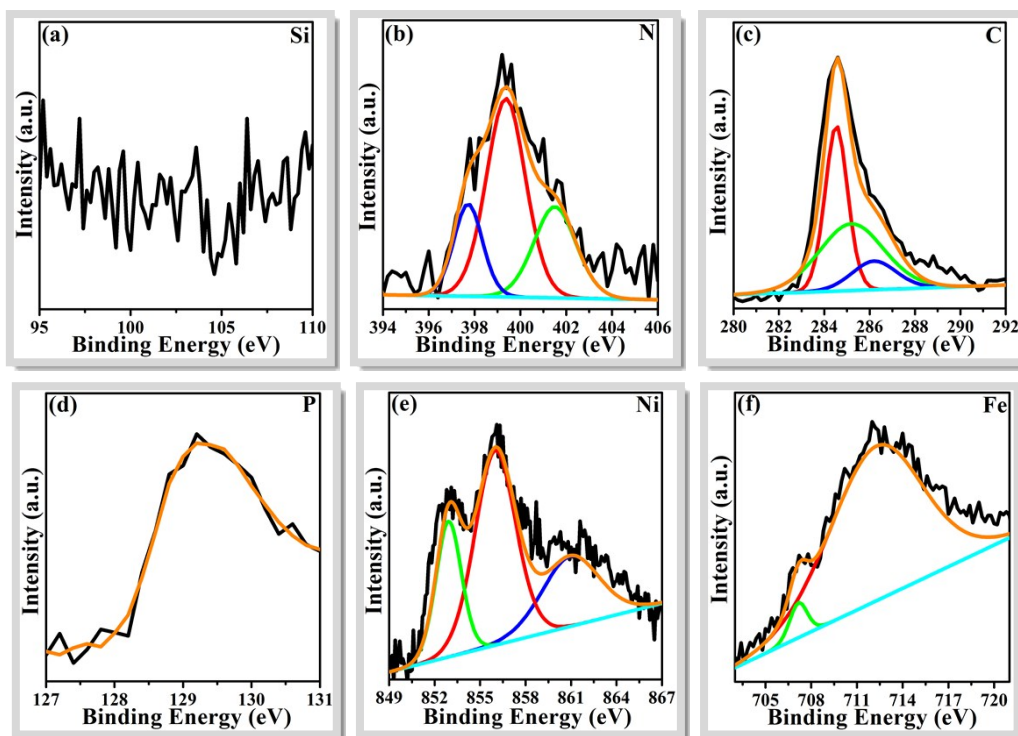

**Figure S6** XPS spectra of N doped C/Ni<sub>5</sub>P<sub>4</sub>/Fe<sub>3</sub>P hollow nanocubes: (a) survey, (b) N 1s, (c) C 1s, (d) P 2p, (e) Ni 2p, and (f) Fe 2p.

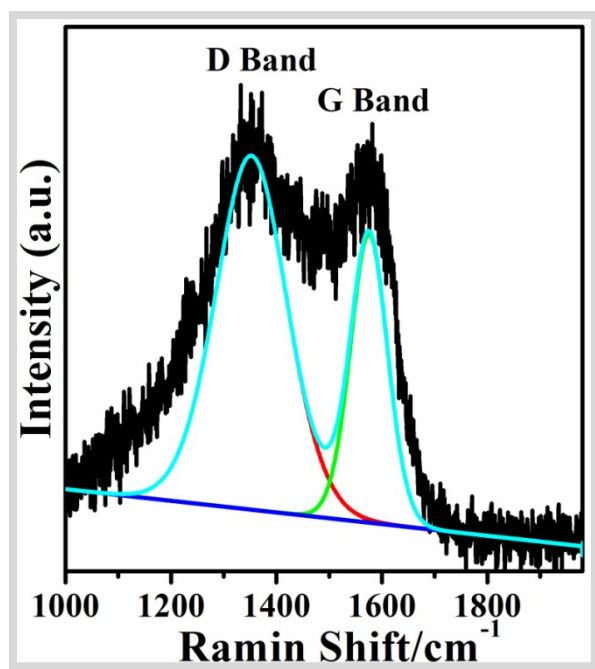

**Figure S7** Raman spectrum of N-doped C coated  $\text{Ni}_5\text{P}_4/\text{Fe}_3\text{P}$  nanoparticles.

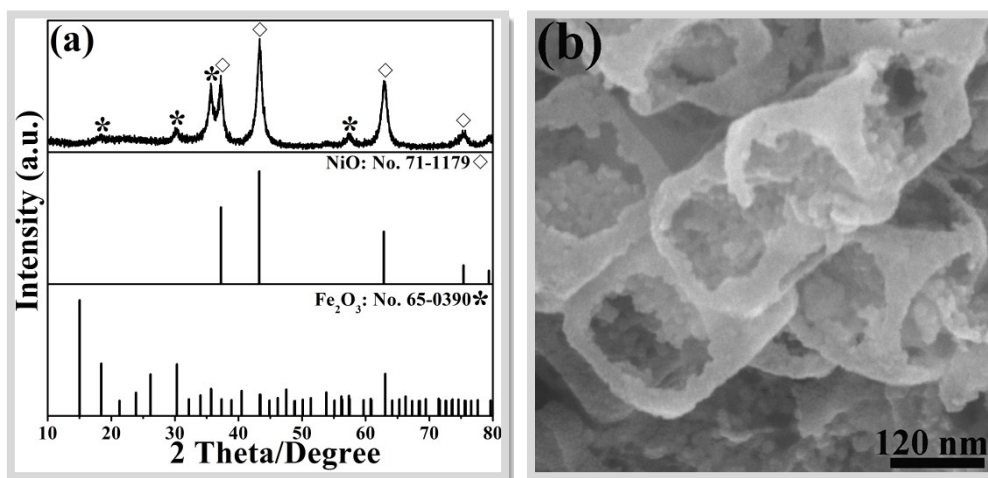

**Figure S8** (a) XRD pattern and (b) SEM image of  $\text{Fe}_2\text{O}_3/\text{NiO}$  hollow nanocubes.



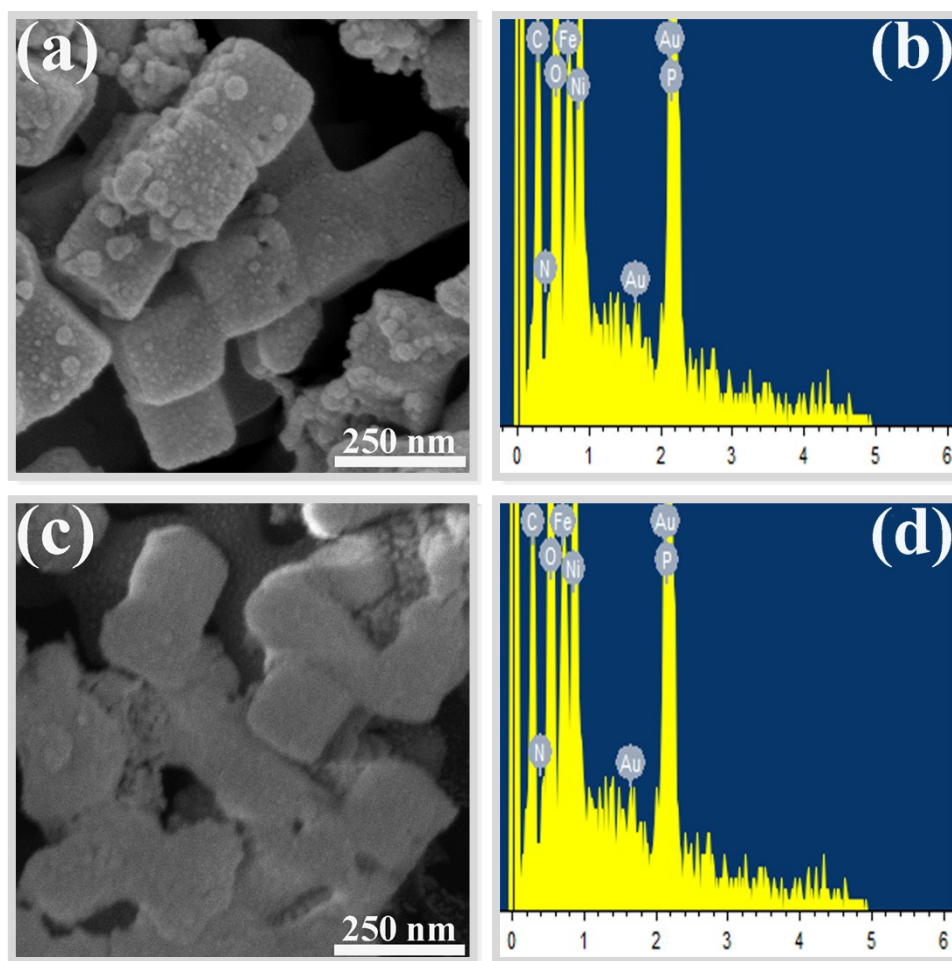

**Figure S9** SEM images and EDS spectra of N doped C/Ni<sub>5</sub>P<sub>4</sub>/Fe<sub>3</sub>P hollow nanocubes before (a-b) and after OER operations (c-d).

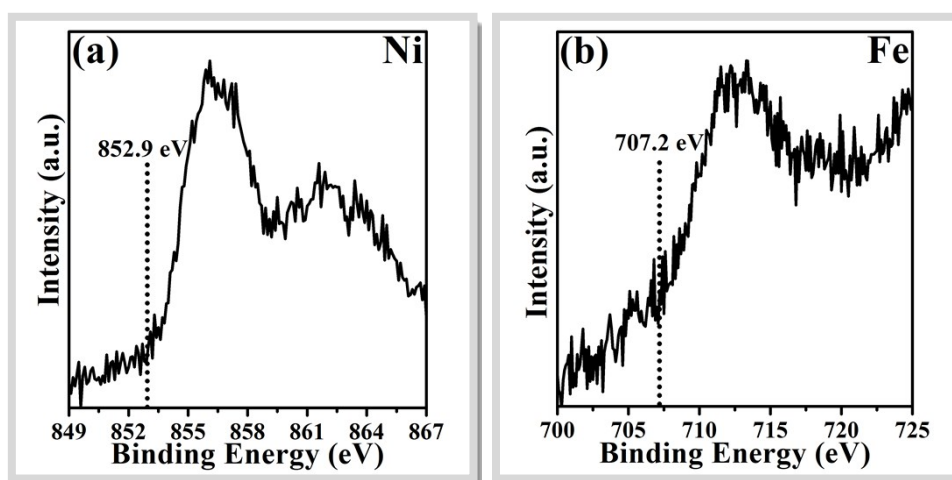

**Figure S10** XPS spectra of N doped C/Ni<sub>5</sub>P<sub>4</sub>/Fe<sub>3</sub>P hollow nanocubes after OER: (a) Ni and (b) Fe.

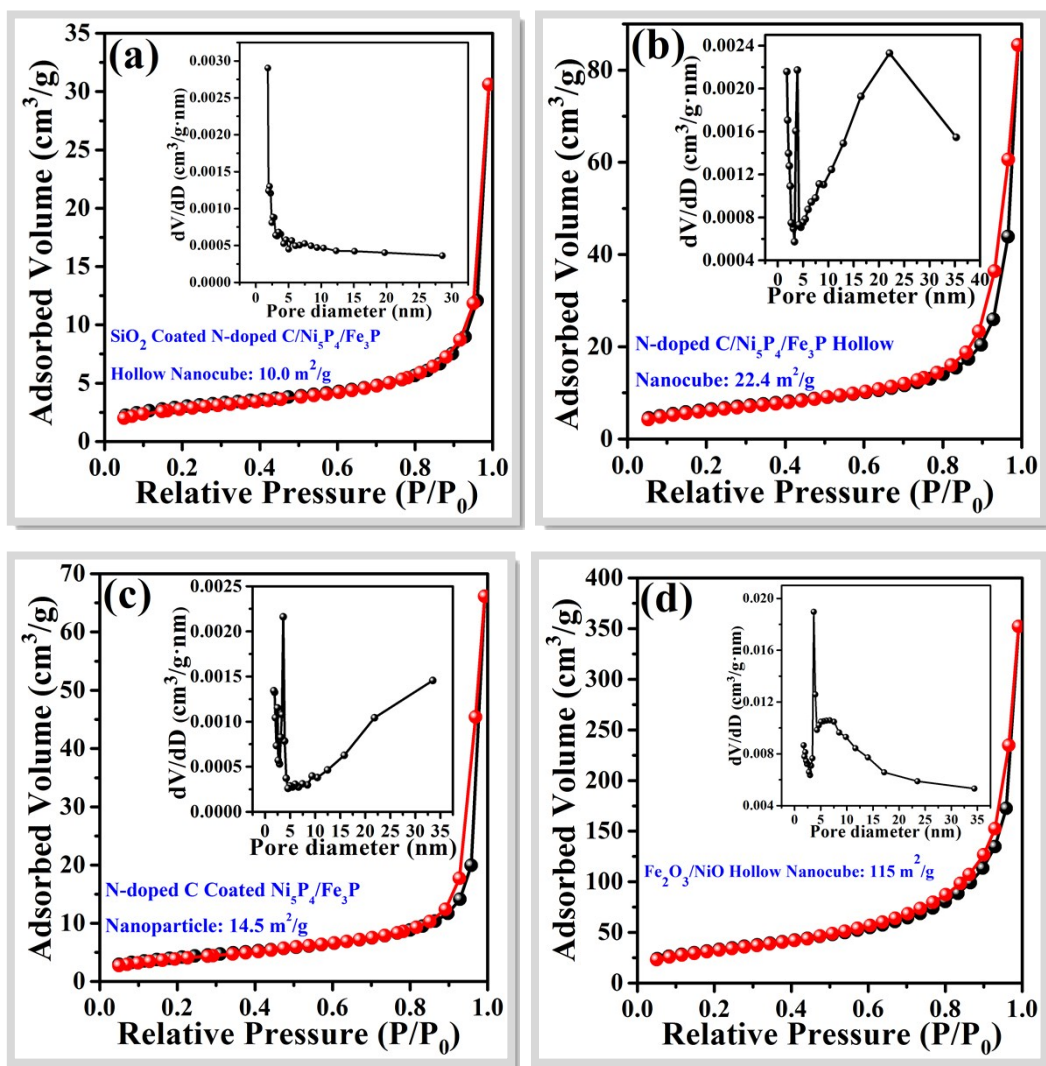

**Figure S11** Nitrogen adsorption/desorption isotherms and corresponding pore-size distributions of (a) SiO<sub>2</sub> coated N-doped C/Ni<sub>5</sub>P<sub>4</sub>/Fe<sub>3</sub>P hollow nanocubes, (b) N-doped C/Ni<sub>5</sub>P<sub>4</sub>/Fe<sub>3</sub>P hollow nanocubes, (c) N-doped C coated Ni<sub>5</sub>P<sub>4</sub>/Fe<sub>3</sub>P nanoparticles, and (d) Fe<sub>2</sub>O<sub>3</sub>/NiO hollow nanocubes.

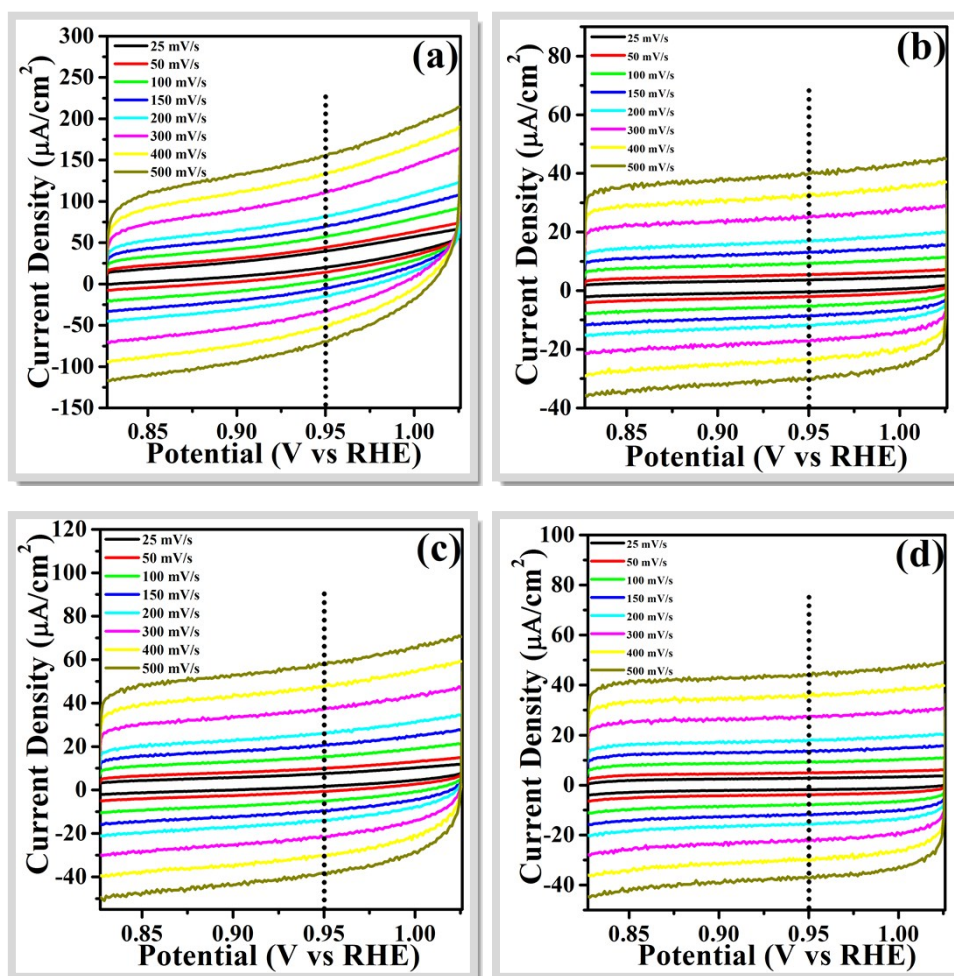

**Figure S12** Cyclic voltammograms recorded at increasing scan rates in 1 M KOH: (a) N-doped C/ $\text{Ni}_5\text{P}_4/\text{Fe}_3\text{P}$  hollow nanocubes, (b)  $\text{SiO}_2$  coated N-doped C/ $\text{Ni}_5\text{P}_4/\text{Fe}_3\text{P}$  hollow nanocubes, (c) N-doped C coated  $\text{Ni}_5\text{P}_4/\text{Fe}_3\text{P}$  nanoparticles, and (d)  $\text{Fe}_2\text{O}_3/\text{NiO}$  hollow nanocubes.

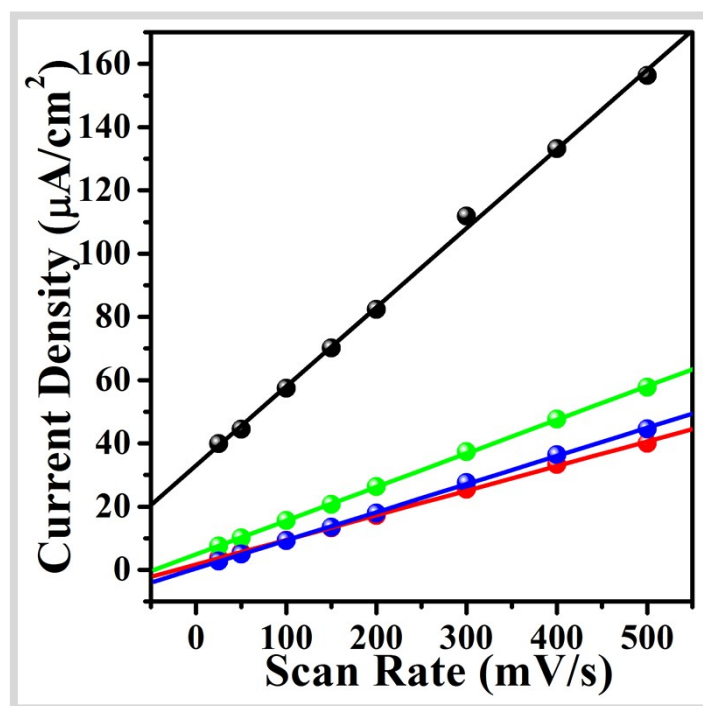

**Figure 13** Linear fitting of capacitive current density achieved at 0.95 V vs. RHE vs. scan rate in 1.0 KOH: N-doped C/Ni<sub>5</sub>P<sub>4</sub>/Fe<sub>3</sub>P hollow nanocubes (black), SiO<sub>2</sub> coated N-doped C/Ni<sub>5</sub>P<sub>4</sub>/Fe<sub>3</sub>P hollow nanocubes (red), N-doped C coated Ni<sub>5</sub>P<sub>4</sub>/Fe<sub>3</sub>P nanoparticles (green), and (d) Fe<sub>2</sub>O<sub>3</sub>/NiO hollow nanocubes (blue).

**Table S1.** Comparison of  $\eta_{10}$  and Tafel slope: present work vs. literature.

| Catalysts                                                  | Loading Mass<br>(mg/cm <sup>2</sup> ) | $\eta_{10}$<br>(mV)                                                                                   | Tafel slope<br>(mV/dec) | Reference                                                       |
|------------------------------------------------------------|---------------------------------------|-------------------------------------------------------------------------------------------------------|-------------------------|-----------------------------------------------------------------|
| N doped C/Ni-P/Fe-P<br>Hollow Nanocube                     | 0.5                                   | 252<br>( $\eta_{20}$ = 276)<br>( $\eta_{50}$ = 305)<br>( $\eta_{100}$ = 332)<br>( $\eta_{250}$ = 385) | 24                      | This work                                                       |
| CoP/rGO                                                    | 0.28                                  | 340<br>( $\eta_{20}$ = 379)                                                                           | 66                      | <i>Chem. Sci.</i> , 2016, 7,<br>1690-1695                       |
| Mn-Co oxyphosphide<br>multi-shelled particle               | 0.25                                  | 320                                                                                                   | 52                      | <i>Angew. Chem. Int. Ed.</i> ,<br>2017, 56, 2386-2389           |
| NiCoP/C nanobox                                            | N/A                                   | 330                                                                                                   | 96                      | <i>Angew. Chem. Int. Ed.</i> ,<br>2017, 56, 3897-3900           |
| CoMnP nanoparticle                                         | 0.28                                  | 330                                                                                                   | 61                      | <i>J. Am. Chem. Soc.</i> , 2016,<br>138, 4006-4009              |
| CoPi-1                                                     | 0.2                                   | 380                                                                                                   | 59                      | <i>Small</i> , 2016, 12, 1709-<br>1715                          |
| Co-P foam                                                  | N/A                                   | 300                                                                                                   | 74                      | <i>J. Mater. Chem. A</i> , 2016,<br>4, 18272-18277              |
| CoP <sub>3</sub> NAs/CFP                                   | 1                                     | 334<br>( $\eta_{50}$ = 407)                                                                           | 62                      | <i>J. Mater. Chem. A</i> , 2016,<br>4, 14539-14544              |
| NiCuP                                                      | N/A                                   | 292                                                                                                   | 49                      | <i>Nanoscale</i> , 2017, 9,<br>4401-4408                        |
| Ni <sub>0.69</sub> Co <sub>0.31</sub> -P                   | 3.5                                   | 266                                                                                                   | 81                      | <i>Nanoscale</i> , 2016, 8,<br>19129-19138                      |
| np-(Co <sub>0.52</sub> Fe <sub>0.48</sub> ) <sub>2</sub> P | 1                                     | 270                                                                                                   | 30                      | <i>Energy Environ. Sci.</i> ,<br>2016, 9, 2257-2261             |
| Ni-P                                                       | 0.2                                   | 300                                                                                                   | 64                      | <i>Energy Environ. Sci.</i> ,<br>2016, 9, 1246-1250             |
| Ni <sub>2</sub> P                                          | 0.14                                  | 290                                                                                                   | 47                      | <i>Energy Environ. Sci.</i> ,<br>2015, 8, 2347-2351             |
| CoP NP/C                                                   | 0.71                                  | 320                                                                                                   | 99                      | <i>ACS Catal.</i> , 2015, 5,<br>6874-6878                       |
| Co-Fe-P-1.7                                                | 0.424                                 | 260                                                                                                   | 58                      | <i>ACS Appl. Mater.<br/>Interfaces</i> , 2017, 9, 362-<br>370   |
| Cu <sub>3</sub> P/CuO@NF                                   | 1.2                                   | 330                                                                                                   | 54                      | <i>ACS Appl. Mater.<br/>Interfaces</i> , 2017, 9, 2240-<br>2248 |
| Co <sub>2</sub> P/CNT                                      | 2                                     | 292                                                                                                   | 68                      | <i>Nano Energy</i> , 2016, 30<br>303-311                        |

|                                                             |      |                                                      |    |                                                    |
|-------------------------------------------------------------|------|------------------------------------------------------|----|----------------------------------------------------|
| Cu <sub>0.3</sub> Co <sub>2.7</sub> P/nitrogen-doped carbon | 0.4  | 190                                                  | 44 | <i>Adv. Energy Mater.</i> , 2017, 7, 160155        |
| Ni-Fe-P@C                                                   | N/A  | 217                                                  | 40 | <i>J. Mater. Chem. A</i> , 2017, 5, 2496-2503      |
| NiFe-P catalyst                                             | N/A  | N/A<br>( $\eta_{20}$ = 204)                          | 88 | <i>J. Mater. Chem. A</i> , 2016, 4, 13866-13873    |
| NiCuP                                                       | 6.70 | N/A<br>( $\eta_{50}$ = 300)<br>( $\eta_{100}$ = 318) | 49 | <i>Nanoscale</i> , 2017, 9, 4401-4408              |
| NiSe/nickel foam                                            | 2.8  | N/A<br>( $\eta_{20}$ = 270)                          | 64 | <i>Angew. Chem. Int. Ed.</i> , 2015, 54, 9351-9355 |
| FeNi-rGO<br>LDH hybrids                                     | 0.25 | 195                                                  | 39 | <i>Angew. Chem. Int. Ed.</i> , 2014, 53, 7584-7588 |
